# Supplementary material
Source: publisher site journal article supplement (https://www.dovepress.com/article/supplementary_file/610271/610271%20Supplementary%20Material.docx)
Supplement: Supplementary file 1 [file 610271%20Supplementary%20Material.docx]

**Supplementary Material**

**Table S1. Search Strategy for Article Identification**

| **Database** | **Search Strategy** | **Hits** |
| --- | --- | --- |
| PubMed | 1. ((((((Anesthesiologist[MeSH Terms]) OR (anesthesiology[MeSH Terms])) OR (anesthesia[MeSH Terms])) OR (anesthetists[MeSH Terms])) 2. ((((((("nontechnical skill"[Title/Abstract]) OR (professional competence[MeSH Terms])) OR (interprofessional relations[MeSH Terms])) OR (interpersonal relation[MeSH Terms])) OR (communication[MeSH Terms])) OR (decision making[MeSH Terms])) OR (leadership[MeSH Terms]))) 3. ((((((methods, scoring[MeSH Terms]) OR (evaluation studies as topic[MeSH Terms])) OR (surveys and questionnaires[MeSH Terms])) OR (checklist[MeSH Terms]))) OR (psychometric[MeSH Terms]))) 4. (((((((continuing medical education[MeSH Terms])) OR (medical education[MeSH Terms])) OR (operating room[MeSH Terms])) OR (care, perioperative[MeSH Terms])) OR (critical care[MeSH Terms])) OR (curriculum)) 5. #1 AND #2 AND #3 AND #4 6. Filters: Books and Documents, Case Reports, Clinical Trial, Comparative Study, Meta-Analysis, Observational Study, Randomized Controlled Trial, Systematic Review. | 164 |
| Scopus | 1. (TITLE-ABS("Anesthesiologist")) OR (TITLE-ABS("Anesthesiology")) OR (TITLE-ABS("Anesthesia")) OR (TITLE-ABS("Anesthetists")) 2. (TITLE-ABS("Nontechnical skill")) OR (TITLE-ABS("Professional competence")) OR (TITLE-ABS("Interprofessional relations")) OR (TITLE-ABS("Interpersonal relation")) OR (TITLE-ABS("Communication")) OR (TITLE-ABS("Decision making")) OR (TITLE-ABS("Leadership")) 3. (TITLE-ABS("Scoring methods")) OR (TITLE-ABS("Evaluation studies")) OR (TITLE-ABS("Surveys and questionnaires")) OR (TITLE-ABS("Checklist")) OR (TITLE-ABS("Psychometric")) 4. (TITLE-ABS("Continuing medical education")) OR (TITLE-ABS("Medical education")) OR (TITLE-ABS("Operating room")) OR (TITLE-ABS("Perioperative care")) OR (TITLE-ABS("Critical care")) OR (TITLE-ABS("Curriculum")) 5. #1 AND #2 AND #3 AND #4 | 99 |
| Google Scholar | ("anesthesiologist" OR "anesthesiology" OR "anesthesia provider" OR "anesthesia professional" OR "anesthetists")  AND  ("nontechnical skills" OR "professional competence" OR "interprofessional relations" OR "interpersonal skills" OR "communication" OR "decision making" OR "leadership" OR "teamwork")  AND  ("scoring methods" OR "evaluation studies" OR "surveys and questionnaires" OR "checklist" OR "psychometric assessment")  AND  ("continuing medical education" OR "medical education" OR "operating room" OR "perioperative care" OR "critical care" OR "curriculum") | 12 |
| CENTRAL | 1. (Anesthesiologist):ti,ab,kw OR (anesthesiology):ti,ab,kw OR (anesthesia):ti,ab,kw OR (anesthetists):ti,ab,kw 2. ("Nontechnical skill"):ti,ab,kw OR ("Professional competence"):ti,ab,kw OR ("Interprofessional relations"):ti,ab,kw OR ("Interpersonal relation"):ti,ab,kw OR (Communication):ti,ab,kw OR ("Decision making"):ti,ab,kw OR (Leadership):ti,ab,kw 3. ("Scoring methods"):ti,ab,kw OR ("Evaluation studies"):ti,ab,kw OR ("Surveys and questionnaires"):ti,ab,kw OR (Checklist):ti,ab,kw OR (Psychometric):ti,ab,kw 4. ("Continuing medical education"):ti,ab,kw OR ("Medical education"):ti,ab,kw OR ("Operating room"):ti,ab,kw OR ("Perioperative care"):ti,ab,kw OR ("Critical care"):ti,ab,kw OR (Curriculum):ti,ab,kw 5. #1 AND #2 AND #3 AND #4 | 21 |
| Citation searching | - | 11 |

Supplementary Table S2. Item-level audit trail

| **Item #** | **Round 1 wording** | **Round 1 rating distribution** | | | **Qualitative comments by experts / source of revision** | **Revision action between rounds** | **Round 2 wording (final)** | **Round 2 rating distribution** | | | **Outcome** |
| --- | --- | --- | --- | --- | --- | --- | --- | --- | --- | --- | --- |
| **% rated 4** | **% rated 3** | **Agreement (3+4)** | **% rated 4** | **% rated 3** | **Agreement (3+4)** |
| **Domain 1: Communication** | | | | | | | | | | | |
| 1.1 | *Communicates clearly and directly with team members.* | 100% | 0% | 100% | E12: communication should be assertive. | Reworded: "directly" → "assertively". | Communicates clearly and assertively with team members. | 92% | 8% | 100% | Retained |
| 1.2 | *Uses the advocacy-inquiry techniques to challenge questionable decisions.* | 64% | 18% | 82% | E01, E02: a clear definition of "advocacy-inquiry" is needed.  E07: replace "challenge" with "question". | Reworded: "challenge" → "question"; added parenthetical definition | Uses advocacy–inquiry techniques to question uncertain decisions (e.g., stating an observation followed by an open-ended question to understand the rationale behind an action) | 77% | 23% | 100% | Retained |
| R1: 1.5 → R2: 1.3 | *Delivers clinical information in a well-structured manner during critical situations* | 91% | 9% | 100% | E10: suggested moving this item earlier in the section. | Reordered to appear earlier in the section; wording preserved. | Delivers clinical information in a well-structured manner during critical situations | 100% | 0% | 100% | Retained |
| R1: 1.3 → R2: 1.4 | *Listens actively and responds appropriately to information from team members* | 100% | 0% | 100% | E10: suggested renumbering (sequencing change only). | Reordered; wording preserved. | Listens actively and responds appropriately to information from team members | 100% | 0% | 100% | Retained |
| R1: 1.4 → R2: 1.5 | *Provides effective and constructive feedback* | 82% | 9% | 91% | E10: suggested renumbering (sequencing change only). | Reordered; wording preserved. | Provides effective and constructive feedback | 85% | 15% | 100% | Retained |
| **Domain 2: Situational Awareness** | | | | | | | | | | | |
| 2.1 | *Continuously monitors the environment and the patient’s condition* | 82% | 9% | 91% | E10: suggested renumbering. | Reordered numbering | Continuously monitors the environment and the patient’s condition | 100% | 0% | 100% | Retained |
| R1: — → R2: 2.2 | *[New item proposed after Round 1]* | n/a | n/a | n/a | E12: situational awareness requires good preparation, such as understanding the equipment to be used and the team working together. | Added as a new item in Round 2 based on Dr. Bambang's overall comment on situational awareness. | Performs pre-action preparation by checking equipment and ensuring all team members understand their respective roles | 92% | 8% | 100% | Retained (newly added in Round 2) |
| R1: 2.5 → R2: 2.3 | *Processes information from multiple sources quickly and accurately* | 64% | 36% | 100% | E10: suggested moving this item earlier in the section. | Reordered to appear earlier; wording preserved. | Processes information from multiple sources quickly and accurately | 92% | 8% | 100% | Retained |
| R1: 2.3 → R2: 2.4 | *Anticipates potential critical scenarios.* | 100% | 0% | 100% | E10: suggested renumbering. The expansion of the wording to include explicit communication of anticipated scenarios was prompted by the broader pre-procedure readiness emphasis introduced by E12. | Reworded to add the communicative and preparatory components. | Communicates potential critical scenarios and prepares anticipatory actions | 85% | 15% | 100% | Retained |
| R1: 2.2 → R2: 2.5 | *Recognizes changes in the patient’s condition before deterioration occurs* | 100% | 0% | 100% | E10: suggested renumbering (sequencing change only). | Reordered; wording preserved. | Recognizes changes in the patient’s condition before deterioration occurs | 100% | 0% | 100% | Retained |
| R1: 2.4 → R2: 2.6 | *Understands the limitations of self and team members.* | 82% | 18% | 100% | E10: suggested renumbering.  E11: "consultation" should be included. | Reworded to incorporate Dr. Dido's suggestion | Acknowledges personal and team limitations and seeks help, opinions, or consultation when necessary | 85% | 15% | 100% | Retained |

Supplementary Table S3. Item and Scale Content Validity Index Based on Expert Ratings

|  |  | **Expert ratings** | | | | | | | | | | | | | **Rating distribution** | | **Content validity** | |
| --- | --- | --- | --- | --- | --- | --- | --- | --- | --- | --- | --- | --- | --- | --- | --- | --- | --- | --- |
| **Item** | **Domain** | **E1** | **E2** | **E3** | **E4** | **E5** | **E6** | **E7** | **E8** | **E9** | **E10** | **E11** | **E12** | **E13** | **% rated 4** | **% rated 3** | **I-CVI** | **S-CVI/Ave** |
| **Communication** | | | | | | | | | | | | | | | | | | |
| 1.1 | Communication | 3 | 4 | 4 | 4 | 4 | 4 | 4 | 4 | 4 | 4 | 4 | 4 | 4 | 92% | 8% | 1.00 | 1.00 |
| 1.2 | Communication | 4 | 4 | 4 | 4 | 4 | 3 | 4 | 4 | 3 | 4 | 4 | 4 | 3 | 77% | 23% | 1.00 |  |
| 1.3 | Communication | 4 | 4 | 4 | 4 | 4 | 4 | 4 | 4 | 4 | 4 | 4 | 4 | 4 | 100% | 0% | 1.00 |  |
| 1.4 | Communication | 4 | 4 | 4 | 4 | 4 | 4 | 4 | 4 | 4 | 4 | 4 | 4 | 4 | 100% | 0% | 1.00 |  |
| 1.5 | Communication | 4 | 4 | 4 | 4 | 4 | 3 | 4 | 4 | 4 | 4 | 4 | 4 | 3 | 85% | 15% | 1.00 |  |
| **Situational Awareness** | | | | | | | | | | | | | | | | | | |
| 2.1 | Situational Awareness | 4 | 4 | 4 | 4 | 4 | 4 | 4 | 4 | 4 | 4 | 4 | 4 | 4 | 100% | 0% | 1.00 |  |
| 2.2 | Situational Awareness | 4 | 3 | 4 | 4 | 4 | 4 | 4 | 4 | 4 | 4 | 4 | 4 | 4 | 92% | 8% | 1.00 |  |
| 2.3 | Situational Awareness | 3 | 4 | 4 | 4 | 4 | 4 | 4 | 4 | 4 | 4 | 4 | 4 | 4 | 92% | 8% | 1.00 |  |
| 2.4 | Situational Awareness | 4 | 3 | 4 | 4 | 4 | 4 | 4 | 4 | 3 | 4 | 4 | 4 | 4 | 85% | 15% | 1.00 |  |
| 2.5 | Situational Awareness | 4 | 4 | 4 | 4 | 4 | 4 | 4 | 4 | 4 | 4 | 4 | 4 | 4 | 100% | 0% | 1.00 |  |
| 2.6 | Situational Awareness | 3 | 4 | 4 | 4 | 4 | 4 | 4 | 4 | 3 | 4 | 4 | 4 | 4 | 85% | 15% | 1.00 |  |
